# Supplementary material for: Nitrogen-Doped CuO@CuS Core–Shell Structure for Highly Efficient Catalytic OER Application
Source: MDPI journal article supplement (doi:10.3390/nano13243160), 2023-12-17
Supplement: s1 [file s1]

## Supporting Information

## Supporting Figures

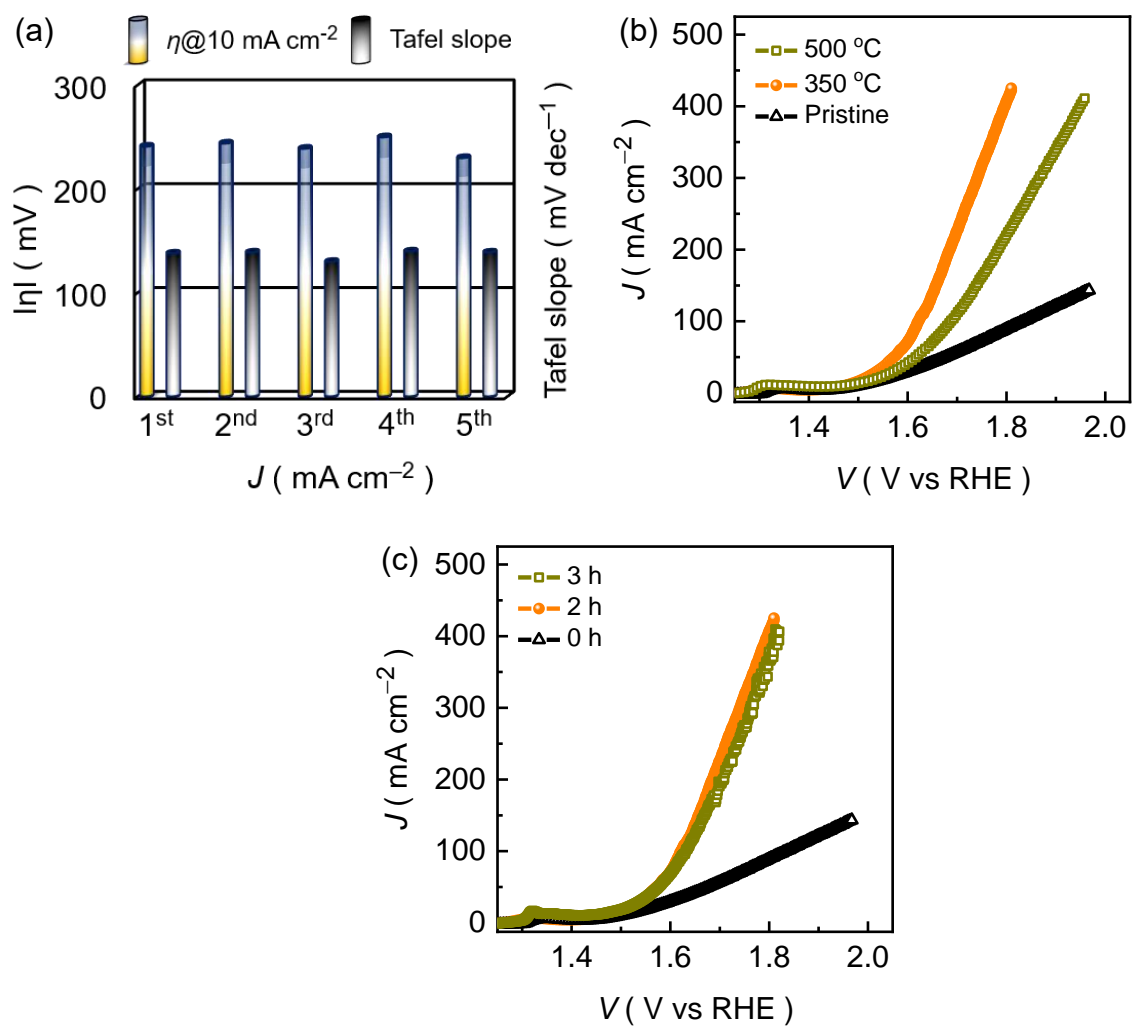

**Figure S1.** (a) Reliability of the OER activity for the N,CuO@CuS core-shell structure catalyst. (b) Temperature and (c) time dependent LSV curves.

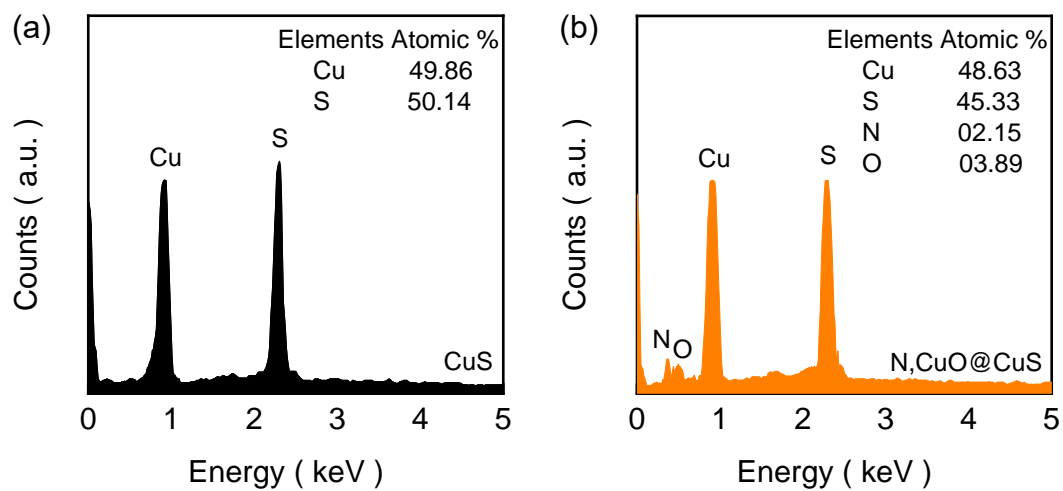

**Figure S2.** EDS spectra for the (a) CuS and (b) N,CuO@CuS electrode films.

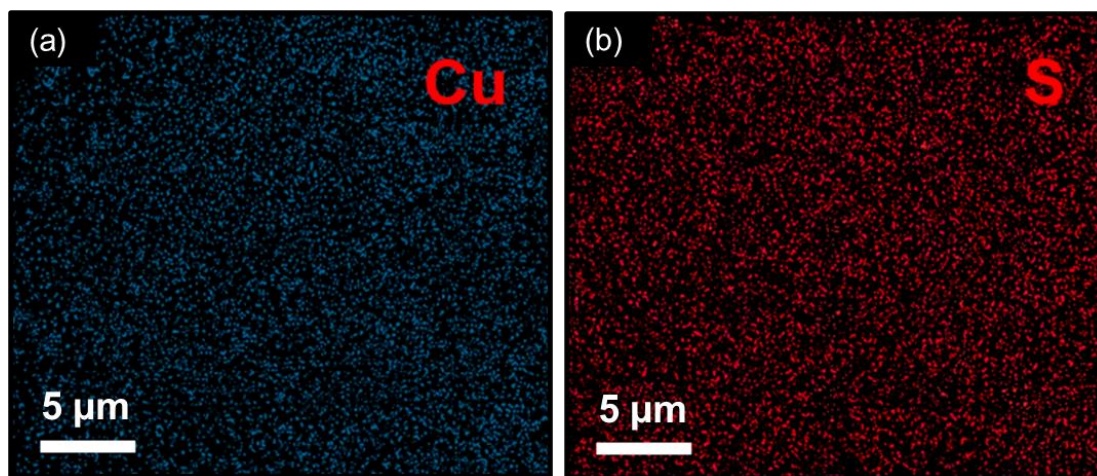

**Figure S3.** (a) Cu and (b) S constituents EDS image mapping for the pure CuS electrode film.

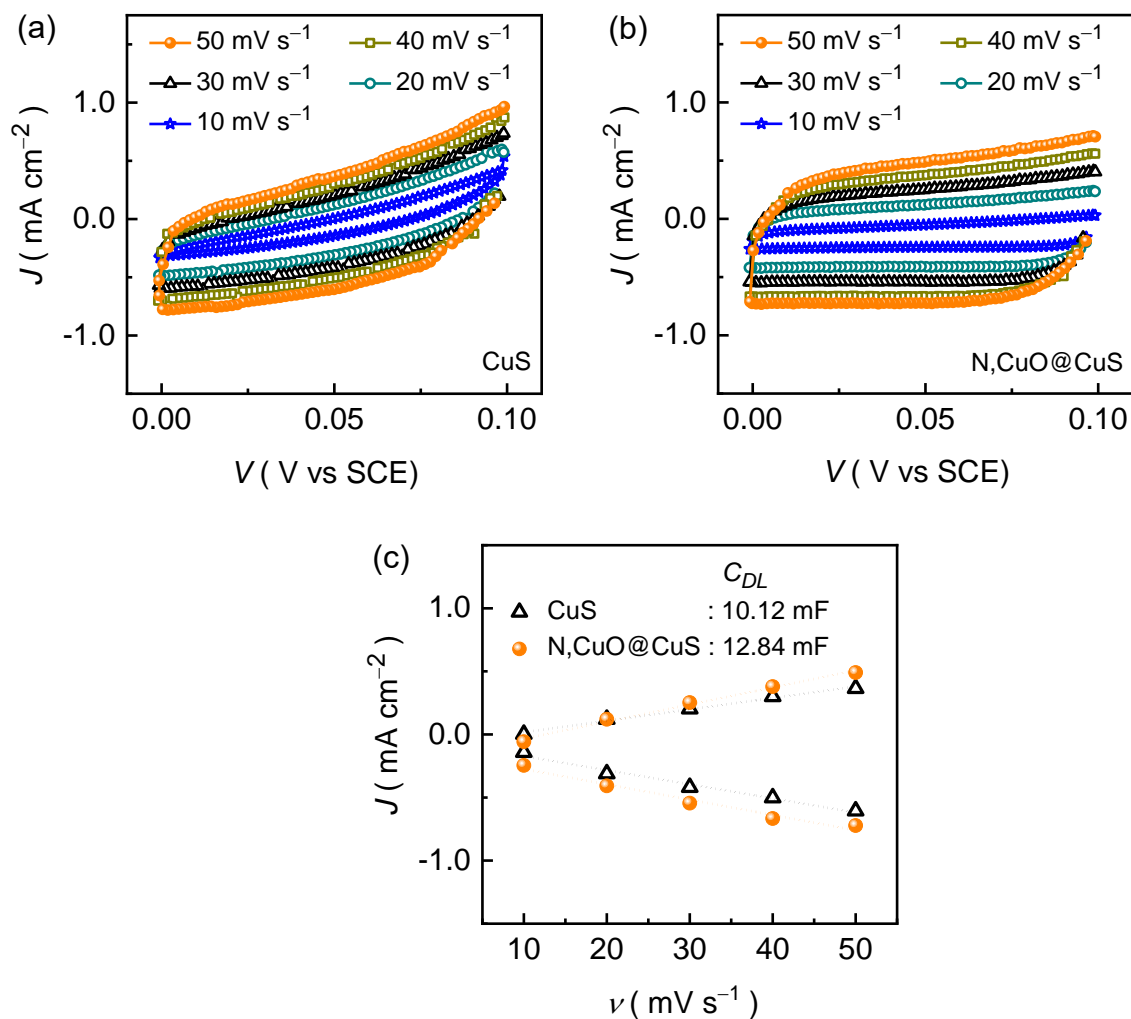

**Figure S4.** Non-Faradaic CV curves for (a) CuS and (b) N,CuO@CuS catalyst measured at various scan rates. (c) “ $J_{DL}$  versus  $\nu$ ” plots obtained at 0.05 V (vs. SCE) from non-Faradaic CV curves to estimate the double-layer capacitance and ECSA. Notably, the average magnitude value of  $C_{DL}$  (i.e., positive and negative slopes obtained from the anodic and cathodic CV sweeps plots, respectively.) was used to calculate ECSA

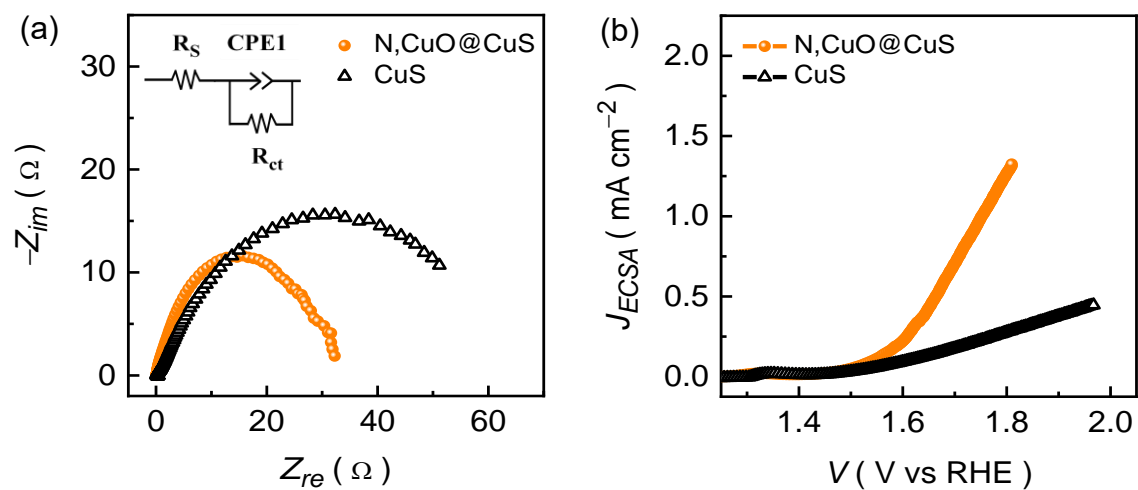

**Figure S5.** (a) Nyquist impedance spectra and (b) ECSA-corrected LSV curves of the CuS and N,CuO@CuS catalysts.

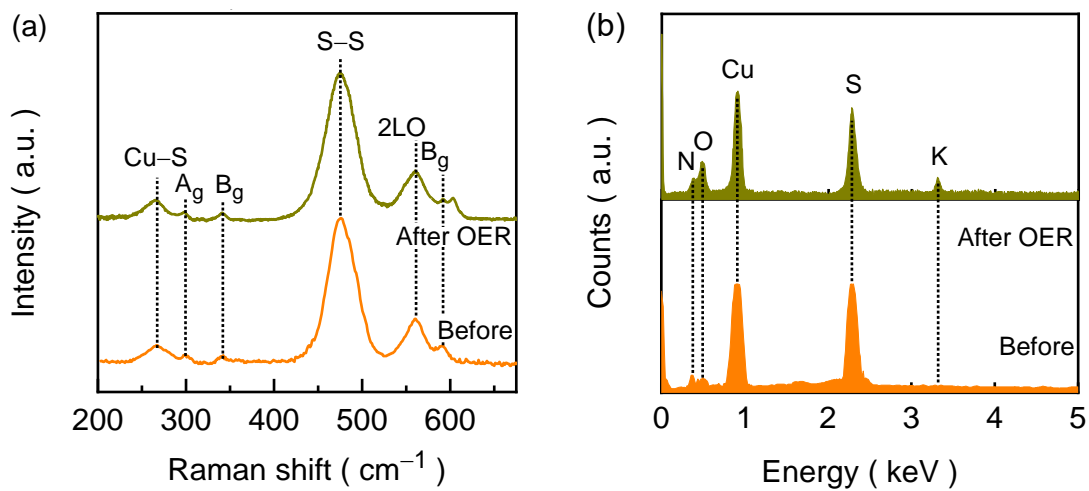

**Figure S6.** (a) Raman (b) EDS spectra for the CuS and N,CuO@CuS catalysts measured after the long-term chronopotentiometric test.
